# Supplementary material for: Leaf Thermal and Chemical Properties as Natural Drivers of Plant Flammability of Native and Exotic Tree Species of the Valparaíso Region, Chile
Source: MDPI journal article supplement (doi:10.3390/ijerph18137191), 2021-07-05
Supplement: s1 [file s1]

## Supplementary Materials

### Leaf thermal and chemical properties as natural drivers of plant flammability of native and exotic tree species of the Valparaíso region, Chile

#### Supplementary Tables

**Table S1.** Multiple comparisons using the HSD Tukey test of flammability parameters of ignition time (IT), flame duration (FD), and total burning time (BT).

| Variable | Species             | Species            | Mean differences | Deviation | Significance | Lower limit | Upper limit |
|----------|---------------------|--------------------|------------------|-----------|--------------|-------------|-------------|
| IT       | <i>Q. saponaria</i> | <i>C. alba</i>     | 14.13*           | 0.65      | 0.00         | 12.33       | 15.93       |
|          | <i>Q. saponaria</i> | <i>E. globulus</i> | 17.01*           | 0.65      | 0.00         | 15.21       | 18.81       |
|          | <i>Q. saponaria</i> | <i>P. radiata</i>  | 1.45             | 0.65      | 0.18         | -0.35       | 3.25        |
|          | <i>Q. saponaria</i> | <i>A. dealbata</i> | 11.34*           | 0.65      | 0.00         | 9.54        | 13.14       |
|          | <i>C. alba</i>      | <i>E. globulus</i> | 2.87*            | 0.65      | 0.00         | 1.07        | 4.67        |
|          | <i>C. alba</i>      | <i>P. radiata</i>  | -12.68*          | 0.65      | 0.00         | -14.48      | -10.88      |
|          | <i>C. alba</i>      | <i>A. dealbata</i> | -2.79*           | 0.65      | 0.00         | -4.59       | -0.99       |
|          | <i>E. globulus</i>  | <i>P. radiata</i>  | -15.55*          | 0.65      | 0.00         | -17.35      | -13.75      |
|          | <i>E. globulus</i>  | <i>A. dealbata</i> | -5.66*           | 0.65      | 0.00         | -7.46       | -3.86       |
|          | <i>P. radiata</i>   | <i>A. dealbata</i> | 9.88*            | 0.65      | 0.00         | 8.08        | 11.68       |
| FD       | <i>Q. saponaria</i> | <i>C. alba</i>     | 2.76*            | 0.90      | 0.02         | 0.28        | 5.23        |
|          | <i>Q. saponaria</i> | <i>E. globulus</i> | 1.97             | 0.90      | 0.18         | -0.50       | 4.44        |
|          | <i>Q. saponaria</i> | <i>P. radiata</i>  | 1.39             | 0.900     | 0.53         | -1.07       | 3.87        |
|          | <i>Q. saponaria</i> | <i>A. dealbata</i> | -6.64*           | 0.90      | 0.00         | -9.11       | -4.17       |
|          | <i>C. alba</i>      | <i>E. globulus</i> | -0.79            | 0.90      | 0.90         | -3.26       | 1.68        |
|          | <i>C. alba</i>      | <i>P. radiata</i>  | -1.36            | 0.90      | 0.55         | -3.84       | 1.10        |
|          | <i>C. alba</i>      | <i>A. dealbata</i> | -9.40*           | 0.90      | 0.00         | -11.88      | -6.93       |
|          | <i>E. globulus</i>  | <i>P. radiata</i>  | -0.57            | 0.900     | 0.96         | -3.04       | 1.90        |
|          | <i>E. globulus</i>  | <i>A. dealbata</i> | -8.61*           | 0.900     | 0.00         | -11.08      | -6.14       |
|          | <i>P. radiata</i>   | <i>A. dealbata</i> | -8.04*           | 0.900     | 0.00         | -10.51      | -5.56       |
| BT       | <i>Q. saponaria</i> | <i>C. alba</i>     | 14.47*           | 1.24      | 0.00         | 11.05       | 17.88       |
|          | <i>Q. saponaria</i> | <i>E. globulus</i> | 8.90*            | 1.24      | 0.00         | 5.48        | 12.31       |
|          | <i>Q. saponaria</i> | <i>P. radiata</i>  | 13.98*           | 1.24      | 0.00         | 10.56       | 17.39       |
|          | <i>Q. saponaria</i> | <i>A. dealbata</i> | 12.04*           | 1.24      | 0.00         | 8.63        | 15.45       |
|          | <i>C. alba</i>      | <i>E. globulus</i> | -5.57*           | 1.24      | 0.00         | -8.98       | -2.15       |
|          | <i>C. alba</i>      | <i>P. radiata</i>  | -0.49            | 1.24      | 0.99         | -3.90       | 2.92        |
|          | <i>C. alba</i>      | <i>A. dealbata</i> | -2.42            | 1.24      | 0.29         | -5.83       | 0.98        |
|          | <i>E. globulus</i>  | <i>P. radiata</i>  | 5.08*            | 1.24      | 0.01         | 1.66        | 8.49        |
|          | <i>E. globulus</i>  | <i>A. dealbata</i> | 3.14             | 1.24      | 0.08         | -0.26       | 6.55        |
|          | <i>P. radiata</i>   | <i>A. dealbata</i> | -1.93            | 1.24      | 0.52         | -5.34       | 1.47        |

\* Present a statistically significant difference. No star would indicate no statistically significant difference. .

**Table S2.** Multiple range test through the percent LSD/HSD test with the confidence interval at 95% of higher heating value (HHV), lower heating value (LHV), flash point (FP), and moisture content (MC).

| Variable | Species            | Species             | Significance | Difference | +/- Limits |
|----------|--------------------|---------------------|--------------|------------|------------|
| HHV      | <i>A. dealbata</i> | <i>E. globulus</i>  | *            | -0.59      | 0.29       |
|          | <i>A. dealbata</i> | <i>C. alba</i>      | *            | 0.93       | 0.29       |
|          | <i>A. dealbata</i> | <i>P. radiata</i>   | *            | 0.99       | 0.29       |
|          | <i>A. dealbata</i> | <i>Q. saponaria</i> | *            | 2.38       | 0.29       |
|          | <i>E. globulus</i> | <i>C. alba</i>      | *            | 1.53       | 0.29       |
|          | <i>E. globulus</i> | <i>P. radiata</i>   | *            | 1.59       | 0.29       |
|          | <i>E. globulus</i> | <i>Q. saponaria</i> | *            | 2.98       | 0.29       |
|          | <i>C. alba</i>     | <i>P. radiata</i>   |              | 0.06       | 0.29       |
|          | <i>C. alba</i>     | <i>Q. saponaria</i> | *            | 1.44       | 0.29       |
|          | <i>P. radiata</i>  | <i>Q. saponaria</i> | *            | 1.38       | 0.29       |

|     |                    |                     |   |       |       |
|-----|--------------------|---------------------|---|-------|-------|
| LHV | <i>A. dealbata</i> | <i>E. globulus</i>  | * | -0.74 | 0.28  |
|     | <i>A. dealbata</i> | <i>C. alba</i>      | * | 1.94  | 0.28  |
|     | <i>A. dealbata</i> | <i>P. radiata</i>   | * | -1.03 | 0.28  |
|     | <i>A. dealbata</i> | <i>Q. saponaria</i> | * | 3.06  | 0.28  |
|     | <i>E. globulus</i> | <i>C. alba</i>      | * | 1.20  | 0.28  |
|     | <i>E. globulus</i> | <i>P. radiata</i>   | * | 0.29  | 0.28  |
|     | <i>E. globulus</i> | <i>Q. saponaria</i> | * | 2.31  | 0.28  |
|     | <i>C. alba</i>     | <i>P. radiata</i>   | * | 0.91  | 0.28  |
|     | <i>C. alba</i>     | <i>Q. saponaria</i> | * | -1.11 | 0.28  |
|     | <i>P. radiata</i>  | <i>Q. saponaria</i> | * | 2.02  | 0.28  |
| FP  | <i>A. dealbata</i> | <i>E. globulus</i>  |   | 3.5   | 68.68 |
|     | <i>A. dealbata</i> | <i>C. alba</i>      |   | 15.0  | 68.68 |
|     | <i>A. dealbata</i> | <i>P. radiata</i>   |   | -17.5 | 68.68 |
|     | <i>A. dealbata</i> | <i>Q. saponaria</i> |   | -35.0 | 68.68 |
|     | <i>E. globulus</i> | <i>C. alba</i>      |   | 11.5  | 68.68 |
|     | <i>E. globulus</i> | <i>P. radiata</i>   |   | -21.0 | 68.68 |
|     | <i>E. globulus</i> | <i>Q. saponaria</i> |   | -38.5 | 68.68 |
|     | <i>C. alba</i>     | <i>P. radiata</i>   |   | -32.5 | 68.68 |
|     | <i>C. alba</i>     | <i>Q. saponaria</i> |   | -50.0 | 68.68 |
|     | <i>P. radiata</i>  | <i>Q. saponaria</i> |   | -17.5 | 68.68 |
| MC  | <i>A. dealbata</i> | <i>E. globulus</i>  |   | 5.0   | 9.19  |
|     | <i>A. dealbata</i> | <i>C. alba</i>      | * | 56.5  | 9.19  |
|     | <i>A. dealbata</i> | <i>P. radiata</i>   | * | 46.0  | 9.19  |
|     | <i>A. dealbata</i> | <i>Q. saponaria</i> | * | 14.0  | 9.19  |
|     | <i>E. globulus</i> | <i>C. alba</i>      | * | 51.5  | 9.19  |
|     | <i>E. globulus</i> | <i>P. radiata</i>   | * | 41.0  | 9.19  |
|     | <i>E. globulus</i> | <i>Q. saponaria</i> |   | 9.0   | 9.19  |
|     | <i>C. alba</i>     | <i>P. radiata</i>   | * | -10.5 | 9.19  |
|     | <i>C. alba</i>     | <i>Q. saponaria</i> | * | -42.5 | 9.19  |
|     | <i>P. radiata</i>  | <i>Q. saponaria</i> | * | -32.0 | 9.19  |

\* Present a statistically significant difference. No star would indicate no statistically significant difference.

**Table S3.** Identification of organic compounds by chromatography (GC/MS) contained in the essential oils (EOs) of exotic and native species in summer 2018–2019.

| RI   | RT    | Compound                    | Molecular weight (g mol <sup>-1</sup> ) | CC | Flash point (°C) | Exotic species       |      |      | Native species       |      |
|------|-------|-----------------------------|-----------------------------------------|----|------------------|----------------------|------|------|----------------------|------|
|      |       |                             |                                         |    |                  | EG                   | PR   | AD   | CA                   | QS   |
|      |       |                             |                                         |    |                  | Relative content (%) |      |      | Relative content (%) |      |
| 958  | 8.57  | octano, 4 etil              | -                                       | AH | -                | ND                   | 0.60 | 2.16 | 0.12                 | ND   |
| 1199 | 13.22 | Dodecane                    | 170.33                                  | AH | 71.1             | ND                   | 0.52 | ND   | 0.08                 | ND   |
| 1386 | 15.93 | Unknown sesquiterpene       | -                                       | ST | -                | 0.79                 | ND   | ND   | ND                   | ND   |
| 1389 | 15.97 | $\alpha$ -Ylangene          | 204.35                                  | ST | 105.1            | ND                   | ND   | ND   | 0.16                 | ND   |
| 1403 | 16.16 | $\beta$ -Elemene            | 204.35                                  | ST | 98.3             | ND                   | ND   | ND   | 0.23                 | ND   |
| 1426 | 16.46 | $\alpha$ -Gurjunene         | 204.35                                  | ST | 101.3            | 2.77                 | ND   | ND   | ND                   | ND   |
| 1438 | 18.59 | (E)- $\beta$ -Caryophyllene | 204.35                                  | ST | 104.9            | 1.22                 | 6.34 | ND   | ND                   | ND   |
| 1445 | 16.71 | Patchoulene                 | 204.35                                  | ST | 110.2            | 1.03                 | ND   | ND   | ND                   | ND   |
| 1446 | 16.72 | $\alpha$ -Bergamotene       | 204.35                                  | ST | 100.6            | ND                   | 1.64 | ND   | 1.97                 | ND   |
| 1451 | 16.78 | $\beta$ -Copaene            | 204.35                                  | ST | 104.9            | 5.77                 | ND   | ND   | ND                   | ND   |
| 1457 | 16.86 | Aromadendrene               | 204.35                                  | ST | 106.5            | 19.26                | ND   | ND   | ND                   | 0.44 |
| 1461 | 19.02 | (E)- $\beta$ -Farnesene     | 204.35                                  | ST | 109.7            | ND                   | ND   | ND   | 0.39                 | ND   |
| 1472 | 17.05 | cis- $\alpha$ -Bisabolene   | 204.35                                  | ST | 110.5            | 1.36                 | 1.12 | ND   | 0.23                 | ND   |
| 1480 | 17.15 | Alloaromadendrene           | 204.35                                  | ST | 106.5            | 47.37                | 0.70 | ND   | 0.22                 | 1.65 |
| 1491 | 17.21 | Unknown sesquiterpene       | -                                       | ST | -                | 1.27                 | 0.40 | ND   | 0.15                 | ND   |
| 1498 | 17.40 | Germacrene D                | 204.35                                  | ST | 111.9            | ND                   | 4.05 | ND   | 1.78                 | ND   |

|      |       |                                        |        |    |       |      |       |       |       |       |
|------|-------|----------------------------------------|--------|----|-------|------|-------|-------|-------|-------|
| 1505 | 17.47 | Unknown sesquiterpene                  | -      | ST | -     | 1.71 | ND    | ND    | 0.19  | ND    |
| 1508 | 17.51 | Unknown sesquiterpene                  | -      | ST | -     | 1.03 | ND    | ND    | ND    | ND    |
| 1513 | 19.61 | $\alpha$ -Farnesene                    | 204.35 | ST | 113.2 | ND   | 1.45  | ND    | ND    | ND    |
| 1514 | 17.57 | Unknown sesquiterpene                  | -      | ST | -     | ND   | ND    | ND    | 0.20  | ND    |
| 1515 | 17.60 | $\alpha$ -Chamigrene                   | 204.35 | ST | 107.0 | 1.56 | 0.96  | ND    | ND    | ND    |
| 1517 | 19.90 | Unknown sesquiterpene                  | -      | ST | -     | ND   | ND    | ND    | 0.19  | ND    |
| 1526 | 17.72 | Lauric acid. methyl ester              | 214.34 | ES | 114.6 | ND   | 27.75 | ND    | ND    | ND    |
| 1531 | 17.79 | Unknown sesquiterpene                  | -      | ST | -     | 1.02 | ND    | ND    | 0.19  | ND    |
| 1538 | 17.87 | Unknown sesquiterpene                  | -      | ST | -     | ND   | 1.05  | ND    | ND    | ND    |
| 1539 | 20.20 | trans-Calamene                         | 202.34 | ST | 125.4 | ND   | ND    | ND    | 0.35  | ND    |
| 1540 | 17.89 | Unknown sesquiterpene                  | -      | ST | -     | 1.19 | ND    | ND    | ND    | ND    |
| 1600 | 18.62 | Hexadecane                             | 226.44 | AH | 135.0 | ND   | ND    | ND    | ND    | 0.86  |
| 1618 | 18.83 | Unknown sesquiterpene                  | -      | ST | -     | ND   | ND    | ND    | 0.21  | ND    |
| 1633 | 19.00 | Unknown sesquiterpene                  | -      | ST | -     | ND   | ND    | ND    | 0.21  | ND    |
| 1726 | 20.05 | Methyl tetradecanoate                  | 242.40 | ES | 134.6 | ND   | 7.11  | ND    | ND    | 0.80  |
| 1799 | 20.85 | Octadecane                             | 254.49 | AH | 165.6 | ND   | ND    | ND    | ND    | 1.05  |
| 1841 | 21.28 | 3,7,11,15-tetramethyl-2-hexadecen-1-ol | 296.53 | OH | -     | ND   | ND    | ND    | ND    | 1.29  |
| 1928 | 22.15 | Palmitic acid. methyl ester            | 270.45 | ES | 152.8 | 3.67 | 4.61  | 4.61  | 4.28  | 12.02 |
| 2000 | 22.86 | Eicosane                               | 282.55 | AH | 186.5 | ND   | ND    | ND    | ND    | 0.61  |
| 2099 | 23.80 | Linoleic acid. methyl ester            | 294.47 | ES | 96.9  | ND   | ND    | ND    | 1.67  | ND    |
| 2100 | 23.81 | Heneicosane                            | 296.57 | AH | 198.8 | ND   | ND    | ND    | ND    | 7.69  |
| 2101 | 23.81 | Methyl linoleate                       | 294.47 | ES | 96.9  | ND   | 1.98  | ND    | ND    | ND    |
| 2109 | 23.88 | Methyl linolenate                      | 292.46 | ES | 101.4 | ND   | 9.00  | ND    | 6.00  | 17.79 |
| 2129 | 24.07 | Methyl stearate                        | 298.50 | ES | 169.3 | ND   | ND    | 1.70  | ND    | 1.10  |
| 2198 | 24.70 | Docosane                               | 310.60 | AH | 210.9 | ND   | 0.40  | ND    | ND    | 0.35  |
| 2236 | 25.02 | Andrographolide                        | 350.45 | DT | 195.5 | ND   | 1.26  | ND    | ND    | ND    |
| 2332 | 25.83 | Methyl 18-methylnonadecanoate          | 326.56 | ES | -     | ND   | 2.40  | ND    | ND    | ND    |
| 2400 | 26.40 | Tetracosane                            | 338.65 | AH | 234.5 | ND   | ND    | ND    | 0.43  | 0.47  |
| 2498 | 27.19 | Pentacosane                            | 352.68 | AH | 246.1 | ND   | ND    | ND    | 0.31  | ND    |
| 2531 | 27.43 | Unknown hydrocarbon                    | -      | -  | -     | ND   | ND    | ND    | 0.29  | ND    |
| 2533 | 27.45 | Docosanoic acid. methyl ester          | 354.61 | ES | 197.7 | ND   | 4.44  | ND    | ND    | ND    |
| 2597 | 27.94 | Hexacosane                             | 366.71 | AH | 257.6 | ND   | ND    | ND    | 0.69  | 0.98  |
| 2699 | 28.70 | Heptacosane                            | 380.70 | AH | 268.9 | 3.90 | ND    | ND    | 7.32  | ND    |
| 2799 | 29.41 | Octacosane                             | 394.76 | AH | 280.1 | ND   | ND    | ND    | 1.48  | 0.88  |
| 2899 | 30.09 | Nonacosane                             | 408.79 | AH | 291.2 | 5.08 | ND    | 78.37 | 8.50  | 31.99 |
| 3016 | 30.96 | Unknown diterpene                      | -      | DT | -     | ND   | ND    | ND    | 1.01  | ND    |
| 3045 | 31.20 | Unknown hydrocarbon                    | -      | -  | -     | ND   | ND    | ND    | 8.13  | ND    |
| 3098 | 31.62 | Hentriacontane                         | 436.84 | AH | 313.1 | ND   | ND    | ND    | 1.28  | ND    |
| 3151 | 32.12 | Unknown triterpene                     | -      | TP | -     | ND   | 12.90 | ND    | ND    | ND    |
| 3187 | 32.46 | Unknown hydrocarbon                    | -      | -  | -     | ND   | ND    | ND    | 9.04  | ND    |
| 3248 | 33.10 | Unknown hydrocarbon                    | -      | -  | -     | ND   | ND    | ND    | 3.46  | ND    |
| 3292 | 33.59 | 16-Hentriacontanone                    | 450.82 | KO | 35.6  | ND   | ND    | ND    | 35.60 | ND    |

RI: Retention index; RT: Retention time; ND: Not detected; CC: classification of organic compounds; EG: *E. globulus*; PR: *P.*

*radiata*; AD: *A. dealbata*; CA: *C. alba*; QS: *Q. Saponaria*; ST: Sesquiterpene; AH: Aliphatic hydrocarbon; ES: Ester; KO: Ketone;

OH: Alcohol; DT: Diterpene; TP: Triterpene.

**Table S4.** Simple regression analysis between parameters of flammability, heating values, and natural driver of leaves with a confidence level of 95%. EOs and MC, independent variables: x; IT, FD and BT, dependent variables: y; and heating value, HHV and LHV, dependent/independent variables: y/x.

| Parameters | EOs                                                         | MC                                                            | FP                                                            | HHV                                                           | LHV                                                         |
|------------|-------------------------------------------------------------|---------------------------------------------------------------|---------------------------------------------------------------|---------------------------------------------------------------|-------------------------------------------------------------|
| <b>IT</b>  | F = 1.51; $p = 0.31$<br>R = -0.58;<br>R <sup>2</sup> = 0.33 | F = 0.07; $p = 0.81$ ;<br>R = -0.15;<br>R <sup>2</sup> = 0.23 | F = 14.11; $p = 0.03$ ;<br>R = 0.91;<br>R <sup>2</sup> = 0.82 | F = 5.74; $p = 0.10$ ;<br>R = -0.81;<br>R <sup>2</sup> = 0.66 | F = 0.98; $p = 0.40$ ; R = -0.50;<br>R <sup>2</sup> = 0.25  |
| <b>FD</b>  | F = 1.61; $p = 0.30$<br>R = -0.59;<br>R <sup>2</sup> = 0.35 | F = 1.96; $p = 0.26$<br>R = 0.63;<br>R <sup>2</sup> = 0.40    | F = 0.01; $p = 0.93$<br>R = 0.06;<br>R <sup>2</sup> = 0.34    | F = 0.11; $p = 0.77$<br>R = 0.18;<br>R <sup>2</sup> = 0.34    | F = 1.01; $p = 0.39$<br>R = 0.50;<br>R <sup>2</sup> = 0.25  |
| <b>BT</b>  | F = 1.55; $p = 0.30$<br>R = -0.58;<br>R <sup>2</sup> = 0.34 | F = 1.23; $p = 0.35$<br>R = 0.54;<br>R <sup>2</sup> = 0.29    | F = 3.85; $p = 0.14$<br>R = 0.75;<br>R <sup>2</sup> = 0.56    | F = 1.09; $p = 0.37$<br>R = -0.52;<br>R <sup>2</sup> = 0.27   | F = 1.63; $p = 0.29$<br>R = -0.59;<br>R <sup>2</sup> = 0.35 |
| <b>HHV</b> | F = 2.23; $p = 0.23$<br>R = 0.65;<br>R <sup>2</sup> = 0.43  | F = 0.38; $p = 0.58$<br>R = 0.34;<br>R <sup>2</sup> = 0.11    | F = 3.20; $p = 0.17$<br>R = -0.72;<br>R <sup>2</sup> = 0.52   |                                                               |                                                             |
| <b>LHV</b> | F = 0.55; $p = 0.51$<br>R = 0.39;<br>R <sup>2</sup> = 0.16  | F = 0.36; $p = 0.59$<br>R = 0.33;<br>R <sup>2</sup> = 0.11    | F = 1.10; $p = 0.37$<br>R = -0.52;<br>R <sup>2</sup> = 0.27   |                                                               |                                                             |
| <b>FP</b>  | F = 1.67; $p = 0.29$<br>R = -0.60;<br>R <sup>2</sup> = 0.36 | F = 0.12; $p = 0.76$<br>R = 0.19;<br>R <sup>2</sup> = 0.04    |                                                               |                                                               |                                                             |
